# Supplementary material for: Eudragit S100 Coated Citrus Pectin Nanoparticles for Colon Targeting of 5-Fluorouracil
Source: MDPI journal article supplement (doi:10.3390/ma8030832), 2015-02-27
Supplement: s1 [file s1]

# Supplementary Information

## Coating of Eudragit S 100 on Citrus Pectin Nanoparticles

The coating of Eudragit S 100 on Citrus Pectin Nanoparticles (CPNs) was done by simple solvent evaporation method as reported by Maestrelli *et al.* (2008). The enteric coating solution was prepared by dissolving Eudragit S 100 in acetone at 12% w/v. Coating was obtained by dispersing 50 mg of nanoparticles in coating solution with a definite Core: Coat ratio followed by solvent evaporation in Rotary Evaporator (Super Fit, Ambala, India). The process was repeated until the desired amount of coating was achieved. Samples of coated nanoparticles were then dried and weighed.

## Optimization of Core: Coat ratio

The Core: Coat ratio was optimized in terms of particle size, shape and size distribution. The coating was done with Core: Coat ratio 1:5, 1:10 and 1:15 (w/w). The results are given in the Table below.

**Table S1.** Optimization of Core: Coat ratio.

| Formulation code | Core: Coat ratio | Average size (nm) | Shape                   | PDI   |
|------------------|------------------|-------------------|-------------------------|-------|
| CNP1             | 1:5              | 184.67 ± 9.36     | Uncoated particles seen | 0.129 |
| CNP2             | 1:10             | 218.12 ± 10.25    | Spherical with uniform  | 0.117 |
| CNP3             | 1:15             | 245.94 ± 11.58    | Aggregates              | 0.157 |

Values represent Mean ± SD, n = 5.
